# Supplementary material for: Loss assessment of building and content damages from potentialearthquake risk in Seoul, Korea
Source: Copernicus journal article supplement (doi:10.5194/nhess-2018-281), 2018-12-12
Supplement: Supplementary file 1 [file aggregate_loss_V2_submit.xlsx]

## Sheet: Total
(a) Loss ratio by occupancy
Magnitude	Focal Depth (Km)	Loss Ratio (%)
		Residential				Commercial				Industrial				Others
		Building Damage		Contents		Building		Contents		Building		Contents		Building		Contents
		Mean	Stdev.	Mean	Stdev.	Mean	Stdev.	Mean	Stdev.	Mean	Stdev.	Mean	Stdev.	Mean	Stdev.	Mean	Stdev.
4	10	0	0	0	0	0	0	0	0	0	0	0	0	0	0	0	0
	15	0	0	0	0	0	0	0	0	0	0	0	0	0	0	0	0
	20	0	0	0	0	0	0	0	0	0	0	0	0	0	0	0	0
5	10	1.73988	1	1	0.26012	1.86653	0.973755	0.977114	0.0932705	1	1	1	0	0.967942	0.967942	0.967942	0.78144
	15	0.73988	0	0	0	0.88999	0.000932088	0	0	0	0	0	0	0	0	0	0
	20	0	0	0	0	0	0	0	0	0	0	0	0	0	0	0	0
6	10	6.22466	3.00502	4.00502	2.26012	6.7036	3.85125	4.91744	2.9482	4	3	4	3	5.04252	3.10664	3.87503	2.71732
	15	3.48478	1	2	1	3.77758	0.983908	2.05177	0.982229	3	1	2	1	2.90382	0.967942	1.93915	0.967942
	20	1.73988	0	1	0	1.88746	0.421235	0.989886	0	1	0	1	0	1.93588	0	0.967942	0
7	10	16.9696	8.26012	13.7499	6.26012	18.407	8.80295	14.4033	6.03795	13	7	12	7	17.0369	8.52171	13.5544	6.0072
	15	11.2247	4	8.7449	3	12.0681	4.37371	8.96855	2.97532	9	4	8	3	10.6474	3.87177	8.71474	2.90056
	20	7.47976	2	5.7449	1.2551	7.7203	1.97131	5.93688	1.01172	6	2	5	2	6.77559	1.93588	5.80765	0.967942
(b) Loss ratio by stucture type
Magnitude	Focal Depth (Km)	Loss Ratio (%)
		Masonry				Concrete				Steel				Wood				Others
		Building		Contents		Building		Contents		Building		Contents		Building		Contents		Building		Contents
		Mean	Stdev.	Mean	Stdev.	Mean	Stdev.	Mean	Stdev.	Mean	Stdev.	Mean	Stdev.	Mean	Stdev.	Mean	Stdev.	Mean	Stdev.	Mean	Stdev.
4	10	0	0	0	0	0	0	0	0	0	0	0	0	0	0	0	0	0	0	0	0
	15	0	0	0	0	0	0	0	0	0	0	0	0	0	0	0	0	0	0	0	0
	20	0	0	0	0	0	0	0	0	0	0	0	0	0	0	0	0	0	0	0	0
5	10	1.99593	0.999373	0.995356	0	0.999348	0.999348	0.999348	0	0.980897	0.80151	0.993632	0.922587	0.999711	0	0.999711	0	1	0	0	0
	15	0.999972	0	0	0	0	0	0	0	0	0	0	0	0	0	0	0	0	0	0	0
	20	0.0673931	0	0	0	0	0	0	0	0	0	0	0	0	0	0	0	0	0	0	0
6	10	6.99123	2.92788	3.99595	1.99935	5.99782	2.9987	4.99782	1.99935	5.0403	3.41326	5.16028	2.92259	3.99942	0.999615	3.99942	0.999615	5	2	2	1
	15	3.9959	0.999972	2	0.927935	2.99935	0.999348	1.99935	0.999348	2.05831	1	2.17939	0.998908	2.99942	0	1.99971	0	3	1	1	0
	20	2.9959	0	1	0	1.00023	0	1	0	1.00109	0	1	0	1.99971	0	1	0	2	0	0	0
7	10	17.9872	7.85451	12.996	5.9266	18.995	7.99739	14.9956	5.99847	16.9076	9.49386	14.8123	6.72937	12.9983	2.99923	13.9985	2.99933	16	7	8	4
	15	11.9959	3.92725	8.00063	2.92728	11.9978	3.9987	9.99717	2.99912	10.105	4.41326	9.23133	2.98617	8.99885	0.999615	8.99942	0.999615	10	4	5	2
	20	8.06389	3.92725	5.00063	0.999373	6.99935	1.99935	5.99935	1	6.05303	1.98726	5.99472	1.43346	5.99942	0	5.99971	0.999615	7	2	3	0
(C) Loss amount						■ Loss amount before calibaration						■ Loss amount after calibaration
Magnitude	Focal Depth	Aggreated loss amount (Million Won)				Magnitude	Focal Depth	Aggreated loss amount (Million USD)				Magnitude	Focal Depth	Aggreated loss amount (Million USD)
		Building	Contents	Total				Building	Contents	Total				Building	Contents	Total
3	10	509815	67706	577521		4	10	2232.34	442.694	2675.03		4	10	1789.02	383.819	2172.84
4	10	2567192	509098	3076290			15	1026.47	169.269	1195.74			15	583.157	110.394	693.551
	15	1180446	194659	1375105			20	501.206	49.847	551.053			20	57.8887	0	57.8887
	20	576387	57324	633711		5	10	9322.06	2489.33	11811.4		5	10	8878.74	2430.45	11309.2
5	10	10720364	2862726	13583090			15	4773	1147.85	5920.85			15	4329.68	1088.97	5418.66
	15	5488952	1320026	6808978			20	2686.62	559.106	3245.73			20	2243.31	500.231	2743.54
	20	3089618	642972	3732590		6	10	33397.9	9616.8	43014.7		6	10	32954.6	9557.93	42512.5
6	10	38407549	11059323	49466872			15	18417.3	5292.95	23710.3			15	17974	5234.07	23208.1
	15	21179908	6086888	27266796			20	11192.2	3149.97	14342.2			20	10748.9	3091.1	13840
	20	12871059	3622469	16493528		7	10	99370.1	27726.6	127097		7	10	98926.8	27667.7	126594
7	10	114275587	31885578	146161165			15	61563.2	17919.4	79482.6			15	61119.9	17860.5	78980.4
	15	70797663	20607312	91404975			20	39859.2	11832	51691.1			20	39415.9	11773.1	51189
	20	45838057	13606764	59444821

## Sheet: 4-10
Occupancy		Builidng		Contents		weight		Structure Type		Builidng		Contents
		mean	stdv.	mean	stdv.					mean	stdv.	mean	stdv.
detached house	323898	0	0	0	0	0.73988		Masonry	8	0	0	0	0
apartment house	111677	0	0	0	0	0.255104		Brick	269528	0	0	0	0
hotel	2196	0	0	0	0	0.00501632		Block	19575	0	0	0	0
Residential	437771	0	0	0	0	1		Stone	174	0	0	0	0
								Other Masonry	1175	0	0	0	0
residential neighborhood /class 1	59335	0	0	0	0	0.45707		Masonry	290460	0	0	0	0
residential neighborhood /class 2	52820	0	0	0	0	0.406884
cultural and assembly	822	0	0	0	0	0.00633204		Reinforced concrete	255881	0	0	0	0
shopping service	1418	0	0	0	0	0.0109232		Precast Concrete	167	0	0	0	0
transportation	132	0	0	0	0	0.00101682		Other R.C	58	0	0	0	0
medical	887	0	0	0	0	0.00683275		Concrete	256106	0	0	0	0
physical training	42	0	0	0	0	0.000323535
sports	338	0	0	0	0	0.00260369		Steel	4695	0	0	0	0
business	7746	0	0	0	0	0.0596691		Light Steel Frame	3487	0	0	0	0
recreational	196	0	0	0	0	0.00150983		Steel pipe	70	0	0	0	0
storage facility	1645	0	0	0	0	0.0126718		Other Steel	140	0	0	0	0
dangerous article storage and disposal properties	863	0	0	0	0	0.00664787		Steel-Concrete	629	0	0	0	0
automobile related	1755	0	0	0	0	0.0135191		Steel Framed R.C	1960	0	0	0	0
animal and plants related	121	0	0	0	0	0.000932088		Other Steel Framed R.C	12	0	0	0	0
feces treatment	81	0	0	0	0	0.00062396		Steel	10993	0	0	0	0
broadcasting and communication	97	0	0	0	0	0.000747211
cemetery facilities	12	0	0	0	0	9.24385e-05		Wood Frame	3	0	0	0	0
tourist rest	33	0	0	0	0	0.000254206		Timber	31174	0	0	0	0
funeral hall	1	0	0	0	0	7.70321e-06		log Frame	9	0	0	0	0
residential neighborhood	1262	0	0	0	0	0.00972145		Wood	31186	0	0	0	0
exhibition hall	159	0	0	0	0	0.00122481
shopping and business	51	0	0	0	0	0.000392864		Others	86	0	0	0	0
Commercial	129816	0	0	0	0	1		Others	86	0	0	0	0
factory	3449	0	0	0	0	1
Industrial	3449	0	0	0	0	1
religion service	3316	0	0	0	0	0.186502
ducational research	10288	0	0	0	0	0.578628
child and geriatric welfare	3548	0	0	0	0	0.19955
correctional and military	58	0	0	0	0	0.00326209
school	570	0	0	0	0	0.0320585
public establishment	0	0	0	0	0	0
Others	17780	0	0	0	0	1

## Sheet: 4-15
Occupancy		Builidng		Contents			Structure Type		Builidng		Contents
		mean	stdv.	mean	stdv.				mean	stdv.	mean	stdv.
detached house	323898	0	0	0	0		Masonry	8	0	0	0	0
apartment house	111677	0	0	0	0		Brick	269528	0	0	0	0
hotel	2196	0	0	0	0		Block	19575	0	0	0	0
Residential	437771	0	0	0	0		Stone	174	0	0	0	0
							Other Masonry	1175	0	0	0	0
residential neighborhood /class 1	59335	0	0	0	0		Masonry	290460	0	0	0	0
residential neighborhood /class 2	52820	0	0	0	0
cultural and assembly	822	0	0	0	0		Reinforced concrete	255881	0	0	0	0
shopping service	1418	0	0	0	0		Precast Concrete	167	0	0	0	0
transportation	132	0	0	0	0		Other R.C	58	0	0	0	0
medical	887	0	0	0	0		Concrete	256106	0	0	0	0
physical training	42	0	0	0	0
sports	338	0	0	0	0		Steel	4695	0	0	0	0
business	7746	0	0	0	0		Light Steel Frame	3487	0	0	0	0
recreational	196	0	0	0	0		Steel pipe	70	0	0	0	0
storage facility	1645	0	0	0	0		Other Steel	140	0	0	0	0
dangerous article storage and disposal properties	863	0	0	0	0		Steel-Concrete	629	0	0	0	0
automobile related	1755	0	0	0	0		Steel Framed R.C	1960	0	0	0	0
animal and plants related	121	0	0	0	0		Other Steel Framed R.C	12	0	0	0	0
feces treatment	81	0	0	0	0		Steel	10993	0	0	0	0
broadcasting and communication	97	0	0	0	0
cemetery facilities	12	0	0	0	0		Wood Frame	3	0	0	0	0
tourist rest	33	0	0	0	0		Timber	31174	0	0	0	0
funeral hall	1	0	0	0	0		log Frame	9	0	0	0	0
residential neighborhood	1262	0	0	0	0		Wood	31186	0	0	0	0
exhibition hall	159	0	0	0	0
shopping and business	51	0	0	0	0		Others	86	0	0	0	0
Commercial	129816	0	0	0	0		Others	86	0	0	0	0
factory	3449	0	0	0	0
Industrial	3449	0	0	0	0
religion service	3316	0	0	0	0
ducational research	10288	0	0	0	0
child and geriatric welfare	3548	0	0	0	0
correctional and military	58	0	0	0	0
school	570	0	0	0	0
public establishment	0	0	0	0	0
Others	17780	0	0	0	0

## Sheet: 4-20
Occupancy		Builidng		Contents			Structure Type		Builidng		Contents
		mean	stdv.	mean	stdv.				mean	stdv.	mean	stdv.
detached house	323898	0	0	0	0		Masonry	8	0	0	0	0
apartment house	111677	0	0	0	0		Brick	269528	0	0	0	0
hotel	2196	0	0	0	0		Block	19575	0	0	0	0
Residential	437771	0	0	0	0		Stone	174	0	0	0	0
							Other Masonry	1175	0	0	0	0
residential neighborhood /class 1	59335	0	0	0	0		Masonry	290460	0	0	0	0
residential neighborhood /class 2	52820	0	0	0	0
cultural and assembly	822	0	0	0	0		Reinforced concrete	255881	0	0	0	0
shopping service	1418	0	0	0	0		Precast Concrete	167	0	0	0	0
transportation	132	0	0	0	0		Other R.C	58	0	0	0	0
medical	887	0	0	0	0		Concrete	256106	0	0	0	0
physical training	42	0	0	0	0
sports	338	0	0	0	0		Steel	4695	0	0	0	0
business	7746	0	0	0	0		Light Steel Frame	3487	0	0	0	0
recreational	196	0	0	0	0		Steel pipe	70	0	0	0	0
storage facility	1645	0	0	0	0		Other Steel	140	0	0	0	0
dangerous article storage and disposal properties	863	0	0	0	0		Steel-Concrete	629	0	0	0	0
automobile related	1755	0	0	0	0		Steel Framed R.C	1960	0	0	0	0
animal and plants related	121	0	0	0	0		Other Steel Framed R.C	12	0	0	0	0
feces treatment	81	0	0	0	0		Steel	10993	0	0	0	0
broadcasting and communication	97	0	0	0	0
cemetery facilities	12	0	0	0	0		Wood Frame	3	0	0	0	0
tourist rest	33	0	0	0	0		Timber	31174	0	0	0	0
funeral hall	1	0	0	0	0		log Frame	9	0	0	0	0
residential neighborhood	1262	0	0	0	0		Wood	31186	0	0	0	0
exhibition hall	159	0	0	0	0
shopping and business	51	0	0	0	0		Others	86	0	0	0	0
Commercial	129816	0	0	0	0		Others	86	0	0	0	0
factory	3449	0	0	0	0
Industrial	3449	0	0	0	0
religion service	3316	0	0	0	0
ducational research	10288	0	0	0	0
child and geriatric welfare	3548	0	0	0	0
correctional and military	58	0	0	0	0
school	570	0	0	0	0
public establishment	0	0	0	0	0
Others	17780	0	0	0	0

## Sheet: 5-10
Occupancy		Builidng		Contents			Structure Type		Builidng		Contents
		mean	stdv.	mean	stdv.				mean	stdv.	mean	stdv.
detached house	323898	2	1	1	0		Masonry	8	1	0	1	0
apartment house	111677	1	1	1	1		Brick	269528	2	1	1	0
hotel	2196	1	1	1	1		Block	19575	2	1	1	0
Residential	437771	1.73988	1	1	0.26012		Stone	174	2	0	0	0
							Other Masonry	1175	1	1	0	0
residential neighborhood /class 1	59335	2	1	1	0		Masonry	290460	1.99593	0.999373	0.995356	0
residential neighborhood /class 2	52820	2	1	1	0
cultural and assembly	822	1	0	1	0		Reinforced concrete	255881	1	1	1	0
shopping service	1418	2	1	1	1		Precast Concrete	167	0	0	0	0
transportation	132	1	0	1	0		Other R.C	58	1	1	1	0
medical	887	1	0	1	0		Concrete	256106	0.999348	0.999348	0.999348	0
physical training	42	1	1	1	0
sports	338	1	1	1	0		Steel	4695	1	1	1	1
business	7746	1	1	1	1		Light Steel Frame	3487	1	1	1	1
recreational	196	1	1	1	1		Steel pipe	70	0	0	0	0
storage facility	1645	1	1	0	0		Other Steel	140	0	0	1	0
dangerous article storage and disposal properties	863	1	1	1	1		Steel-Concrete	629	1	1	1	0
automobile related	1755	1	1	1	1		Steel Framed R.C	1960	1	0	1	1
animal and plants related	121	3	1	1	0		Other Steel Framed R.C	12	1	0	1	0
feces treatment	81	1	0	1	0		Steel	10993	0.980897	0.80151	0.993632	0.922587
broadcasting and communication	97	1	1	1	1
cemetery facilities	12	0	0	0	0		Wood Frame	3	1	0	1	0
tourist rest	33	1	1	1	1		Timber	31174	1	0	1	0
funeral hall	1	0	0	0	0		log Frame	9	0	0	0	0
residential neighborhood	1262	0	0	0	0		Wood	31186	0.999711	0	0.999711	0
exhibition hall	159	1	0	1	0
shopping and business	51	0	0	0	0		Others	86	1	0	0	0
Commercial	129816	1.86653	0.973755	0.977114	0.0932705		Others	86	1	0	0	0
factory	3449	1	1	1	0
Industrial	3449	1	1	1	0
religion service	3316	1	1	1	0
ducational research	10288	1	1	1	1
child and geriatric welfare	3548	1	1	1	1
correctional and military	58	1	1	1	1
school	570	0	0	0	0
public establishment	0	0	0	0	0
Others	17780	0.967942	0.967942	0.967942	0.78144

## Sheet: 5-15
Occupancy		Builidng		Contents			Structure Type		Builidng		Contents
		mean	stdv.	mean	stdv.				mean	stdv.	mean	stdv.
detached house	323898	1	0	0	0		Masonry	8	0	0	0	0
apartment house	111677	0	0	0	0		Brick	269528	1	0	0	0
hotel	2196	0	0	0	0		Block	19575	1	0	0	0
Residential	437771	0.73988	0	0	0		Stone	174	1	0	0	0
							Other Masonry	1175	1	0	0	0
residential neighborhood /class 1	59335	1	0	0	0		Masonry	290460	0.999972	0	0	0
residential neighborhood /class 2	52820	1	0	0	0
cultural and assembly	822	0	0	0	0		Reinforced concrete	255881	0	0	0	0
shopping service	1418	1	0	0	0		Precast Concrete	167	0	0	0	0
transportation	132	0	0	0	0		Other R.C	58	0	0	0	0
medical	887	0	0	0	0		Concrete	256106	0	0	0	0
physical training	42	0	0	0	0
sports	338	0	0	0	0		Steel	4695	0	0	0	0
business	7746	0	0	0	0		Light Steel Frame	3487	0	0	0	0
recreational	196	1	0	0	0		Steel pipe	70	0	0	0	0
storage facility	1645	1	0	0	0		Other Steel	140	0	0	0	0
dangerous article storage and disposal properties	863	0	0	0	0		Steel-Concrete	629	0	0	0	0
automobile related	1755	0	0	0	0		Steel Framed R.C	1960	0	0	0	0
animal and plants related	121	1	1	0	0		Other Steel Framed R.C	12	0	0	0	0
feces treatment	81	0	0	0	0		Steel	10993	0	0	0	0
broadcasting and communication	97	0	0	0	0
cemetery facilities	12	0	0	0	0		Wood Frame	3	0	0	0	0
tourist rest	33	0	0	0	0		Timber	31174	0	0	0	0
funeral hall	1	0	0	0	0		log Frame	9	0	0	0	0
residential neighborhood	1262	0	0	0	0		Wood	31186	0	0	0	0
exhibition hall	159	0	0	0	0
shopping and business	51	0	0	0	0		Others	86	0	0	0	0
Commercial	129816	0.88999	0.000932088	0	0		Others	86	0	0	0	0
factory	3449	0	0	0	0
Industrial	3449	0	0	0	0
religion service	3316	0	0	0	0
ducational research	10288	0	0	0	0
child and geriatric welfare	3548	0	0	0	0
correctional and military	58	0	0	0	0
school	570	0	0	0	0
public establishment	0	0	0	0	0
Others	17780	0	0	0	0

## Sheet: 5-20
Occupancy		Builidng		Contents			Structure Type		Builidng		Contents
		mean	stdv.	mean	stdv.				mean	stdv.	mean	stdv.
detached house	323898	0	0	0	0		Masonry	8	0	0	0	0
apartment house	111677	0	0	0	0		Brick	269528	0	0	0	0
hotel	2196	0	0	0	0		Block	19575	1	0	0	0
Residential	437771	0	0	0	0		Stone	174	0	0	0	0
							Other Masonry	1175	0	0	0	0
residential neighborhood /class 1	59335	0	0	0	0		Masonry	290460	0.0673931	0	0	0
residential neighborhood /class 2	52820	0	0	0	0
cultural and assembly	822	0	0	0	0		Reinforced concrete	255881	0	0	0	0
shopping service	1418	0	0	0	0		Precast Concrete	167	0	0	0	0
transportation	132	0	0	0	0		Other R.C	58	0	0	0	0
medical	887	0	0	0	0		Concrete	256106	0	0	0	0
physical training	42	0	0	0	0
sports	338	0	0	0	0		Steel	4695	0	0	0	0
business	7746	0	0	0	0		Light Steel Frame	3487	0	0	0	0
recreational	196	0	0	0	0		Steel pipe	70	0	0	0	0
storage facility	1645	0	0	0	0		Other Steel	140	0	0	0	0
dangerous article storage and disposal properties	863	0	0	0	0		Steel-Concrete	629	0	0	0	0
automobile related	1755	0	0	0	0		Steel Framed R.C	1960	0	0	0	0
animal and plants related	121	0	0	0	0		Other Steel Framed R.C	12	0	0	0	0
feces treatment	81	0	0	0	0		Steel	10993	0	0	0	0
broadcasting and communication	97	0	0	0	0
cemetery facilities	12	0	0	0	0		Wood Frame	3	0	0	0	0
tourist rest	33	0	0	0	0		Timber	31174	0	0	0	0
funeral hall	1	0	0	0	0		log Frame	9	0	0	0	0
residential neighborhood	1262	0	0	0	0		Wood	31186	0	0	0	0
exhibition hall	159	0	0	0	0
shopping and business	51	0	0	0	0		Others	86	0	0	0	0
Commercial	129816	0	0	0	0		Others	86	0	0	0	0
factory	3449	0	0	0	0
Industrial	3449	0	0	0	0
religion service	3316	0	0	0	0
ducational research	10288	0	0	0	0
child and geriatric welfare	3548	0	0	0	0
correctional and military	58	0	0	0	0
school	570	0	0	0	0
public establishment	0	0	0	0	0
Others	17780	0	0	0	0

## Sheet: 6-10
Occupancy		Builidng		Contents			Structure Type		Builidng		Contents
		mean	stdv.	mean	stdv.				mean	stdv.	mean	stdv.
detached house	323898	7	3	4	2		Masonry	8	4	0	4	0
apartment house	111677	4	3	4	3		Brick	269528	7	3	4	2
hotel	2196	5	4	5	3		Block	19575	7	2	4	2
Residential	437771	6.22466	3.00502	4.00502	2.26012		Stone	174	6	2	4	1
							Other Masonry	1175	5	2	3	2
residential neighborhood /class 1	59335	7	4	5	3		Masonry	290460	6.99123	2.92788	3.99595	1.99935
residential neighborhood /class 2	52820	7	4	5	3
cultural and assembly	822	5	2	4	2		Reinforced concrete	255881	6	3	5	2
shopping service	1418	7	4	6	3		Precast Concrete	167	3	1	2	1
transportation	132	5	3	4	3		Other R.C	58	5	3	4	2
medical	887	5	3	5	3		Concrete	256106	5.99782	2.9987	4.99782	1.99935
physical training	42	5	3	4	3
sports	338	5	3	5	3		Steel	4695	5	4	5	3
business	7746	5	3	5	3		Light Steel Frame	3487	5	3	5	3
recreational	196	6	3	5	3		Steel pipe	70	4	3	4	2
storage facility	1645	5	3	4	2		Other Steel	140	4	2	4	2
dangerous article storage and disposal properties	863	5	3	4	3		Steel-Concrete	629	6	3	5	2
automobile related	1755	5	4	4	3		Steel Framed R.C	1960	5	3	6	3
animal and plants related	121	9	4	5	2		Other Steel Framed R.C	12	7	2	6	2
feces treatment	81	4	2	4	3		Steel	10993	5.0403	3.41326	5.16028	2.92259
broadcasting and communication	97	5	4	5	3
cemetery facilities	12	3	0	2	0		Wood Frame	3	4	0	4	0
tourist rest	33	5	3	4	3		Timber	31174	4	1	4	1
funeral hall	1	3	0	2	0		log Frame	9	2	0	2	0
residential neighborhood	1262	0	0	0	0		Wood	31186	3.99942	0.999615	3.99942	0.999615
exhibition hall	159	5	2	4	2
shopping and business	51	0	0	0	0		Others	86	5	2	2	1
Commercial	129816	6.7036	3.85125	4.91744	2.9482		Others	86	5	2	2	1
factory	3449	4	3	4	3
Industrial	3449	4	3	4	3
religion service	3316	5	3	4	2
ducational research	10288	5	3	4	3
child and geriatric welfare	3548	6	4	4	3
correctional and military	58	6	4	5	3
school	570	0	0	0	0
public establishment	0	0	0	0	0
Others	17780	5.04252	3.10664	3.87503	2.71732

## Sheet: 6-15
Occupancy		Builidng		Contents			Structure Type		Builidng		Contents
		mean	stdv.	mean	stdv.				mean	stdv.	mean	stdv.
detached house	323898	4	1	2	1		Masonry	8	2	0	2	0
apartment house	111677	2	1	2	1		Brick	269528	4	1	2	1
hotel	2196	3	1	2	1		Block	19575	4	1	2	0
Residential	437771	3.48478	1	2	1		Stone	174	4	1	2	0
							Other Masonry	1175	3	1	2	0
residential neighborhood /class 1	59335	4	1	2	1		Masonry	290460	3.9959	0.999972	2	0.927935
residential neighborhood /class 2	52820	4	1	2	1
cultural and assembly	822	3	0	2	0		Reinforced concrete	255881	3	1	2	1
shopping service	1418	4	1	3	1		Precast Concrete	167	2	0	1	0
transportation	132	2	1	2	1		Other R.C	58	3	1	2	1
medical	887	2	1	2	1		Concrete	256106	2.99935	0.999348	1.99935	0.999348
physical training	42	2	1	2	1
sports	338	3	1	2	1		Steel	4695	2	1	2	1
business	7746	2	1	3	1		Light Steel Frame	3487	2	1	2	1
recreational	196	3	1	3	1		Steel pipe	70	2	1	2	1
storage facility	1645	3	1	2	1		Other Steel	140	2	1	2	1
dangerous article storage and disposal properties	863	3	1	2	1		Steel-Concrete	629	3	1	2	1
automobile related	1755	3	1	2	1		Steel Framed R.C	1960	2	1	3	1
animal and plants related	121	5	2	2	1		Other Steel Framed R.C	12	3	1	3	0
feces treatment	81	2	1	2	1		Steel	10993	2.05831	1	2.17939	0.998908
broadcasting and communication	97	3	2	2	1
cemetery facilities	12	2	0	1	0		Wood Frame	3	3	0	2	0
tourist rest	33	2	1	2	1		Timber	31174	3	0	2	0
funeral hall	1	2	0	1	0		log Frame	9	1	0	1	0
residential neighborhood	1262	0	0	0	0		Wood	31186	2.99942	0	1.99971	0
exhibition hall	159	3	0	2	0
shopping and business	51	0	0	0	0		Others	86	3	1	1	0
Commercial	129816	3.77758	0.983908	2.05177	0.982229		Others	86	3	1	1	0
factory	3449	3	1	2	1
Industrial	3449	3	1	2	1
religion service	3316	3	1	2	1
ducational research	10288	3	1	2	1
child and geriatric welfare	3548	3	1	2	1
correctional and military	58	3	1	3	1
school	570	0	0	0	0
public establishment	0	0	0	0	0
Others	17780	2.90382	0.967942	1.93915	0.967942

## Sheet: 6-20
Occupancy		Builidng		Contents			Structure Type		Builidng		Contents
		mean	stdv.	mean	stdv.				mean	stdv.	mean	stdv.
detached house	323898	2	0	1	0		Masonry	8	1	0	1	0
apartment house	111677	1	0	1	0		Brick	269528	3	0	1	0
hotel	2196	1	0	1	0		Block	19575	3	0	1	0
Residential	437771	1.73988	0	1	0		Stone	174	3	0	1	0
							Other Masonry	1175	2	0	1	0
residential neighborhood /class 1	59335	2	0	1	0		Masonry	290460	2.9959	0	1	0
residential neighborhood /class 2	52820	2	1	1	0
cultural and assembly	822	1	0	1	0		Reinforced concrete	255881	1	0	1	0
shopping service	1418	2	0	1	0		Precast Concrete	167	1	0	1	0
transportation	132	1	0	1	0		Other R.C	58	2	0	1	0
medical	887	1	0	1	0		Concrete	256106	1.00023	0	1	0
physical training	42	1	0	1	0
sports	338	1	0	1	0		Steel	4695	1	0	1	0
business	7746	1	0	1	0		Light Steel Frame	3487	1	0	1	0
recreational	196	2	0	1	0		Steel pipe	70	1	0	1	0
storage facility	1645	2	1	1	0		Other Steel	140	1	0	1	0
dangerous article storage and disposal properties	863	2	0	1	0		Steel-Concrete	629	1	0	1	0
automobile related	1755	1	0	1	0		Steel Framed R.C	1960	1	0	1	0
animal and plants related	121	3	1	1	0		Other Steel Framed R.C	12	2	0	1	0
feces treatment	81	1	0	1	0		Steel	10993	1.00109	0	1	0
broadcasting and communication	97	1	1	1	0
cemetery facilities	12	1	0	1	0		Wood Frame	3	2	0	1	0
tourist rest	33	1	0	1	0		Timber	31174	2	0	1	0
funeral hall	1	1	0	1	0		log Frame	9	1	0	1	0
residential neighborhood	1262	0	0	0	0		Wood	31186	1.99971	0	1	0
exhibition hall	159	1	0	1	0
shopping and business	51	0	0	0	0		Others	86	2	0	0	0
Commercial	129816	1.88746	0.421235	0.989886	0		Others	86	2	0	0	0
factory	3449	1	0	1	0
Industrial	3449	1	0	1	0
religion service	3316	2	0	1	0
ducational research	10288	2	0	1	0
child and geriatric welfare	3548	2	0	1	0
correctional and military	58	2	0	1	0
school	570	0	0	0	0
public establishment	0	0	0	0	0
Others	17780	1.93588	0	0.967942	0

[truncated: 3 more sheets: 7-10, 7-15, 7-20]
